# Supplementary material for: Enriched domain detector: a program for detection of wide genomic enrichment domains robust against local variations
Source: PubMed Central journal article supplement — Nucleic Acids Res. 2014 Apr 29;42(11):e92. doi: 10.1093/nar/gku324 (PMC4066758; doi:10.1093/nar/gku324), 2014-04-29
Supplement: supp_gku324_nar-00346-met-n-2014-File002.pdf [file supp_gku324_nar-00346-met-n-2014-File002.pdf]

## **Enriched Domain Detector: a program for detection of wide genomic enrichment domains robust against local variations**

**Eivind Lund, Anja R. Oldenburg, and Philippe Collas**

Stem Cell Epigenetics Laboratory, Institute of Basic Medical Sciences, Faculty of Medicine, University of Oslo, and Norwegian Center for Stem Cell Research, PO Box 1112 Blindern, 0317 Oslo, Norway

### **SUPPLEMENTARY DATA**

**Figure S1.** LMNA enrichment and gene density within peaks identified by EDD, BroadPeak, SICER and RSEG.

**Figure S2.** LMNA enrichment detected by ChIP-seq negatively correlates with gene expression.

**Table S1.** Effect of including or excluding duplicate LMNA or LMNB1 ChIP-seq reads on genome coverage under LADs identified by EDD

**Table S2.** ChIP-qPCR primers used in this study

**Table S3.** P-values and W values returned by the Wilcoxon rank-sum tests performed in this study

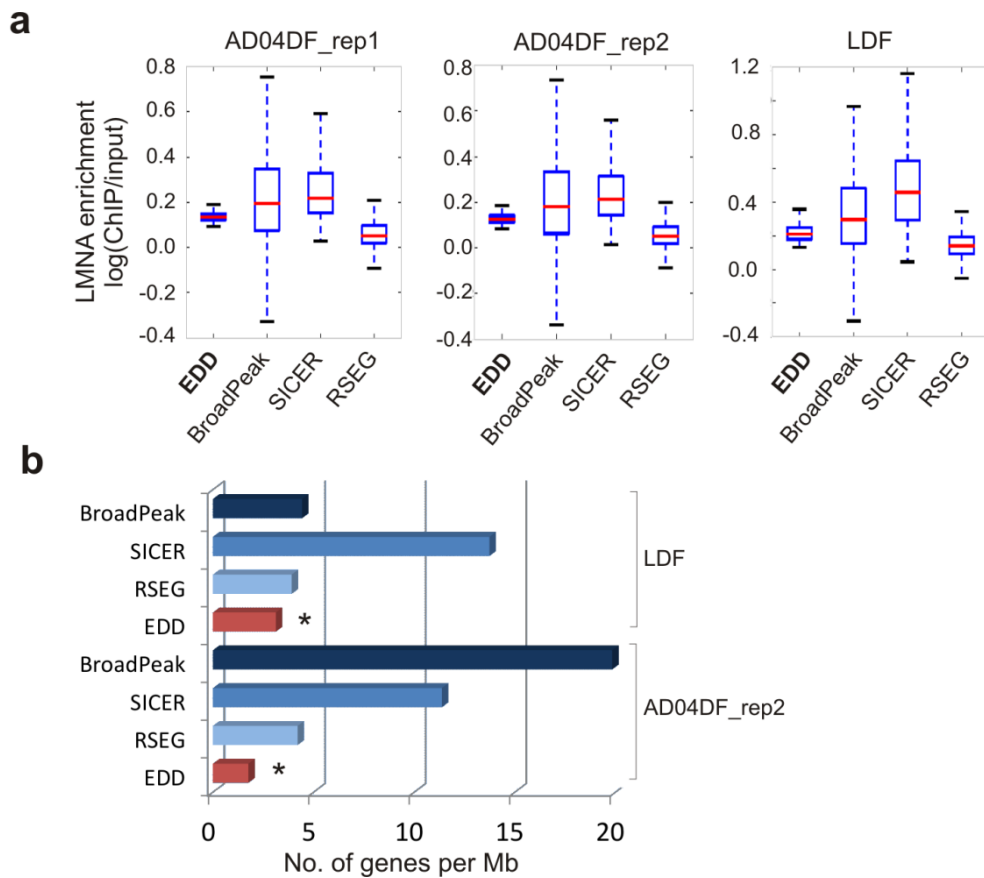

**Figure S1.** LMNA enrichment and gene density within peaks identified by EDD, BroadPeak, SICER and RSEG. **(a)** Median LMNA enrichment within peaks detected by the indicated algorithms. **(b)** Number of protein-coding genes per megabase covered by indicated peak callers in AD04DFs (replicate 2) and LDFs (\* $P < 0.001$ , Wilcoxon rank-sum test;  $W = 0$  for each comparison).

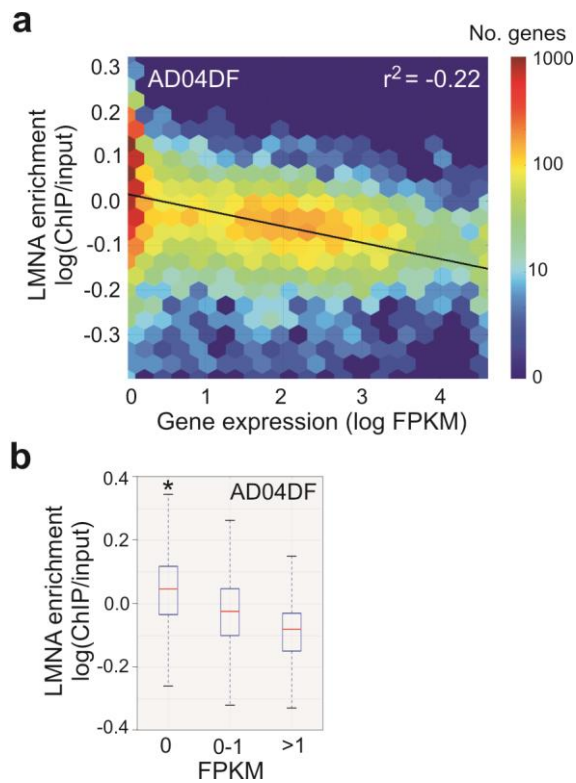

**Figure S2.** LMNA enrichment detected by ChIP-seq negatively correlates with gene expression level. **(a)** Heat map of LMNA enrichment in AD04DFs (y axis) on protein-coding genes of > 1 Kb as a function of gene expression level (log FPKM, x axis). **(b)** Median LMNA enrichment level in protein-coding genes of > 1 Kb that are repressed (FPKM = 0; 3833 genes), weakly expressed (FPKM = 0-1; 3435 genes) and highly expressed (FPKM > 1; 7795 genes). \* $P < 10^{-80}$  relative to FPKM = 0-1 or FPKM > 1; Wilcoxon rank-sum test; see Supplementary Table S3 for W and P values.

## SUPPLEMENTARY DATA

Lund et al.

**Table S1.** Effect of including or excluding duplicate LMNA or LMNB1 ChIP-seq reads on genome coverage under LADs identified by EDD

| ChIP sample | Cell type   | Genome coverage (Mb)      |                           |           |        | Jaccard index |
|-------------|-------------|---------------------------|---------------------------|-----------|--------|---------------|
|             |             | Including duplicate reads | Excluding duplicate reads | Intersect | Union  |               |
| LMNA        | AD04DF_rep1 | 676.20                    | 728.18                    | 651.6     | 752.8  | 0.865         |
| LMNA        | AD04DF_rep2 | 702.38                    | 721.50                    | 675.7     | 748.2  | 0.903         |
| LMNA        | LDF         | 809.15                    | 694.66                    | 654.9     | 848.9  | 0.771         |
| LMNB1       | IMR90_rep1  | 1025.74                   | 1041.67                   | 1011.7    | 1055.7 | 0.958         |
| LMNB1       | IMR90_rep2  | 1033.64                   | 1078.18                   | 1021.0    | 1090.8 | 0.936         |
| LMNB1       | IMR90_rep3  | 1025.74                   | 1041.67                   | 1011.7    | 1055.7 | 0.958         |

**Table S2.** ChIP-qPCR primers used in this study

| <b>Gene</b>               | <b>Forward primer (F)<br/>Reverse primer (R)</b>    | <b>Position rel. to<br/>TSS (nt)</b> | <b>Product<br/>size (bp)</b> |
|---------------------------|-----------------------------------------------------|--------------------------------------|------------------------------|
| <u>Genic regions</u>      |                                                     |                                      |                              |
| <i>DNAL4</i>              | F: TACGAAGCCACCCACAGTTC<br>R: CTGGCTCTTTCCAAGGAGGG  | -2209 / -2077                        | 133                          |
| <i>RPA4</i>               | F: TAGGGTGGGCTGAAAAACAG<br>R: CCGGATTGCTGGTTAAAGA   | -2437 / -2124                        | 139                          |
| <i>SCN10A</i>             | F: GGAAGAGGGTGAGGGAAAGC<br>R: TGTCACCAGTCCTTCCATGC  | -3414 / -3297                        | 149                          |
| <i>DEFA3</i>              | F: AGCCCTTCACATCCATTGGG<br>R: CCCGGGCATGGTCTAGAATC  | -2414 / -2337                        | 78                           |
| <i>ACTL7A</i>             | F: GGATCAGGTTTCAGGGTGTGG<br>R: GGACCTAGCGTGCAACTCTT | +1723 / +1859                        | 137                          |
| <i>BACE2</i>              | F: CCCAGCACCATAGGCTTGAA<br>R: GGATGGCAGAGCTGTCTTGT  | -1864 / -1732                        | 133                          |
| <i>LDHB</i>               | F: AAGCCTCTGGAAGGAGACCT<br>R: TTGGAAATCCGAGTACCGCC  | -182 / -60                           | 123                          |
| <i>STX2</i>               | F: CAAAGGACTGTGCACCAAGC<br>R: CCAAGCACCCAGCACTCTAA  | +684 / + 757                         | 74                           |
|                           |                                                     | <b>Genomic position (nt)</b>         |                              |
| <u>Intergenic regions</u> |                                                     |                                      |                              |
| Chr12 r2                  | F: CTCCCAGGCATGTCTCACTT<br>R: GAATGCTTTGCAGTCACCCC  | 129887824-129888838                  | 130                          |
| Chr8 r1                   | F: TGCTAGCTGACAGGTGATGC<br>R: GTTGTTTCGTGCTAACGGCTG | 6834856-6836060                      | 51                           |
| Chr14 r1                  | F: AGCTAACAGGACAGAGTGCT<br>R: TGTGCATGGGAAGGTCTTGG  | 104288010-104288880                  | 56                           |
| Chr3 r1                   | F: CCCTCAGCATAGCGGTGTAG<br>R: AGAACTCAGTGAGGGCTTGC  | 38868181-38873708                    | 138                          |

**Table S3.** P-values and W values returned by the Wilcoxon rank-sum tests performed in this study

| <b>Analysis</b>                                         | <b>Component1</b> | <b>Component2</b> | <b>P value</b> | <b>W value</b> |
|---------------------------------------------------------|-------------------|-------------------|----------------|----------------|
| <b>LMNB1_rep1 peak length</b>                           |                   |                   |                |                |
| Fig. 2b                                                 | EDD               | BroadPeak         | 0              | 29210230       |
|                                                         | EDD               | PeakRanger        | 0              | 21323779       |
|                                                         | EDD               | RSEG              | 0              | 9385114        |
|                                                         | EDD               | SICER             | 0              | 63677469       |
| <b>LMNA peak length, AD04DF_rep1</b>                    |                   |                   |                |                |
| Fig. 4c                                                 | EDD               | BroadPeak         | 2.32e-237      | 4699745        |
|                                                         | EDD               | PeakRanger        | 1.77e-205      | 715728         |
|                                                         | EDD               | RSEG              | 7.86e-99       | 839687         |
|                                                         | EDD               | SICER             | 3.42e-175      | 348564         |
| <b>LMNA peak length, AD04DF_rep2</b>                    |                   |                   |                |                |
| Fig. 4c                                                 | EDD               | BroadPeak         | 3.42e-228      | 4510527        |
|                                                         | EDD               | PeakRanger        | 6.39e-198      | 672588         |
|                                                         | EDD               | RSEG              | 1.34e-75       | 617082         |
|                                                         | EDD               | SICER             | 7.19e-166      | 303093         |
| <b>LMNA peak length, LDF</b>                            |                   |                   |                |                |
| Fig. 4c                                                 | EDD               | BroadPeak         | 3.38e-197      | 420145         |
|                                                         | EDD               | PeakRanger        | 2.72e-292      | 1369060        |
|                                                         | EDD               | RSEG              | 5.16e-93       | 1031357        |
|                                                         | EDD               | SICER             | 1.15e-262      | 833289         |
| <b>LMNA enrichment as function of FPKM, LDF</b>         |                   |                   |                |                |
| Fig. 5c                                                 | FPKM 0            | FPKM 0-1          | 1.47e-54       | 1135138        |
|                                                         | FPKM 0            | FPKM > 1          | 0              | 3526357        |
| <b>LMNA enrichment as function of FPKM, AD04DF_rep1</b> |                   |                   |                |                |
| Fig. S2b                                                | FPKM 0            | FPKM 0-1          | 6.71e-82       | 3145970        |
|                                                         | FPKM 0            | FPKM > 1          | 0              | 9372546        |
